# Supplementary material
Source: ML conference proceedings conference paper supplement (https://proceedings.neurips.cc/paper_files/paper/2017/hash/1f71e393b3809197ed66df836fe833e5-Abstract.html)
Supplement: Supplementary file [file 1f71e393b3809197ed66df836fe833e5-Supplemental.zip]

## Supplementary material

**Derivation for Lemma 1, 4** As ,  $r_t^K \leq r_t^0 \leq 2\sqrt{\beta_1}\sigma_t^0$ , we can say that

$$\begin{aligned} \sum_{t=1}^T \left(r_t^K\right)^2 &\leq \sum 4\beta_1^{uc} (\sigma_t^0)^2 + \sum_{t=1}^T \frac{1}{t^2} \\ &\leq 4\beta_1^{uc} \frac{c_1^{uc} \gamma_T^{uc}}{4} + \frac{\pi^2}{6} \quad (\text{because } \sum_{t=1}^T \frac{1}{t^2} \leq \frac{\pi^2}{6}) \\ &= \beta_1^{uc} c_1^{uc} \gamma_T^{uc} + \frac{\pi^2}{6} \end{aligned}$$

**Derivation for  $A_{T_0}$  and  $B_T$  in Lemma 3** From Equation 7

$$\bar{R}_T \leq 2\sqrt{\frac{\beta_T^c}{T} (A_{T_0} + B_T)} + \frac{1}{T} \sum_{t=1}^T \frac{1}{t^2} \quad (9)$$

For the first term,

$$\begin{aligned} A_{T_0} &= \sum_{t=1}^{T_0} ((\sigma_{t-1}^c(\mathbf{x}_t^c))^2 \\ &= \sum \sigma^2 \overbrace{(\sigma_{r_{T_0}}^{-2} (\sigma_{t-1}^c(x_t^c))^2)}^{s^2} \end{aligned} \quad (10)$$

Now, since  $\sigma_{t-1}^c \leq 1$ ,

$$\begin{aligned} s^2 &= \sigma_{r_{T_0}}^{-2} (\sigma_{t-1}^c(x_t^c))^2 \\ &\leq \sigma_{r_{T_0}}^{-2} \end{aligned}$$

We know if  $C_2 = \frac{\sigma_{r_{T_0}}^{-2}}{\log(1+\sigma_{r_{T_0}}^{-2})}$ , then  $s^2 \leq C_2 \log((1+s^2))$

Thus we have from equation 10,

$$\begin{aligned} A_{T_0} &= \sum \sigma^2 s^2 \\ &\leq \sum \sigma^2 C_2 \log(1 + \sigma_{r_{T_0}}^{-2} (\sigma_{t-1}^c)^2) \\ &= \sum \sigma^2 \frac{\sigma_{r_{T_0}}^{-2}}{\log(1 + \sigma_{r_{T_0}}^{-2})} \log(1 + \sigma_{r_{T_0}}^{-2} (\sigma_{t-1}^c)^2) \\ &= \sum_{t=1}^{T_0} \left( \frac{\log(1 + \sigma_{r_{T_0}}^{-2} (\sigma_{t-1}^c(\mathbf{x}_t^c))^2)}{\log(1 + \sigma_{r_{T_0}}^{-2})} \right) \end{aligned}$$

Since  $\sigma_{t-1}^c(\mathbf{x}_t^c) \leq 1$ , we have  $A_{T_0} \leq \sum_{t=1}^{T_0} \left( \frac{\log(1 + \sigma_{r_{T_0}}^{-2} \times 1)}{\log(1 + \sigma_{r_{T_0}}^{-2})} \right) = T_0$ , which is a constant. Hence

$\lim_{T \rightarrow \infty} \frac{\beta_T^c}{T} A_{T_0} \rightarrow 0$ .

For the second term,

$$\begin{aligned} B_T &= \sum_{T_0+1}^T ((\sigma_{t-1}^c(\mathbf{x}_t^c))^2 \\ &\leq \sum_{t=T_0+1}^T \left( \frac{\log(1 + (\sigma_{r_{T_0}}^{-2} + \sigma^{-2})(\sigma_{t-1}^c(\mathbf{x}_t^c))^2)}{\log(1 + (\sigma_{r_{T_0}}^{-2} + \sigma^{-2}))} \right) \end{aligned}$$

From Lemma 2 after  $T > T_0$  we know  $\sigma_{r_{T_0}} < \sigma$ , we have

$$\begin{aligned}
B_T &\leq \sum_{t=T_0+1}^T \left( \frac{\log(1 + (\sigma^{-2} + \sigma^{-2})(\sigma_{t-1}^c(\mathbf{x}_t^c))^2)}{\log(1 + (\sigma^{-2} + \sigma^{-2}))} \right) \\
&= \sum_{t=T_0+1}^T \left( \frac{\log(1 + 2\sigma^{-2}(\sigma_{t-1}^c(\mathbf{x}_t^c))^2)}{\log(1 + 2\sigma^{-2})} \right) \\
&= \sum_{t=T_0+1}^T \left( \frac{\log(1 + \tilde{\sigma}^2(\sigma_{t-1}^c(\mathbf{x}_t^c))^2)}{\log(1 + 2\sigma^{-2})} \right) \\
&\leq \frac{1}{\log(1 + 2\sigma^{-2})} \tilde{\gamma}_T
\end{aligned}$$

where  $\tilde{\gamma}_T = \max_{A \in \mathcal{X}^c, |A|=T} I(y_A : f_A)$  assuming  $y = f + \tilde{\epsilon}$ , where  $\tilde{\epsilon} \sim \mathcal{N}(0, \sigma^2/2)$ . Since  $\tilde{\gamma}_T$  grows sublinearly with  $T$ , especially for SE kernel  $\tilde{\gamma}_T \sim \mathcal{O}((\log T)^{d+1})$ , it is easy to show that  $\lim_{T \rightarrow \infty} \frac{\beta_T^c}{T} B_T \rightarrow 0$ . Hence  $\lim_{T \rightarrow \infty} \tilde{R}_T \rightarrow 0$ .
